# Supplementary material for: Grazing Affects Bacterial and Fungal Diversities and Communities in the Rhizosphere and Endosphere Compartments of Leymus chinensis through Regulating Nutrient and Ion Distribution
Source: PubMed Central journal article supplement (PMC7996188; doi:10.3390/microorganisms9030476), 2021-02-25
Supplement: microorganisms-09-00476-s001.pdf [file microorganisms-09-00476-s001.pdf]

1  
2  
3  
4  
5  
6  
7  
8  
9  
10  
11  
12  
13  
14  
15  
16  
17  
18  
19  
20

## Supplementary Materials

**Grazing Affects Bacterial and Fungal Diversities and Communities in the Rhizosphere and Endosphere Compartments of *Leymus chinensis* through Regulating Nutrient and Ion Distribution**

Yurong Yang, Siying Chen, Xuefeng Wu, Sajid Iqbal Syed, Irfan Ullah Shah Syed, Beitong Huang, Pingting Guan, Deli Wang\*

Key Laboratory for Vegetation Ecology, Ministry of Education/State Environmental Protection Key Laboratory of Wetland Ecology and Vegetation Restoration, School of Environment, Northeast Normal University, Changchun, Jilin 130117, China; yangyr422@nenu.edu.cn (Y.Y.); chensy915@nenu.edu.cn (S.C.); wuxf112@nenu.edu.cn (X.W.); Sajidswat85@yahoo.com (S.S.); Irfanhashmi347@gmail.com (I.S.); huangbt228@nenu.edu.cn (B.H.); guanpt994@nenu.edu.cn (P.G.)

**\*Correspondence:** wangd@nenu.edu.cn; Tel.: +86-135-0440-3900

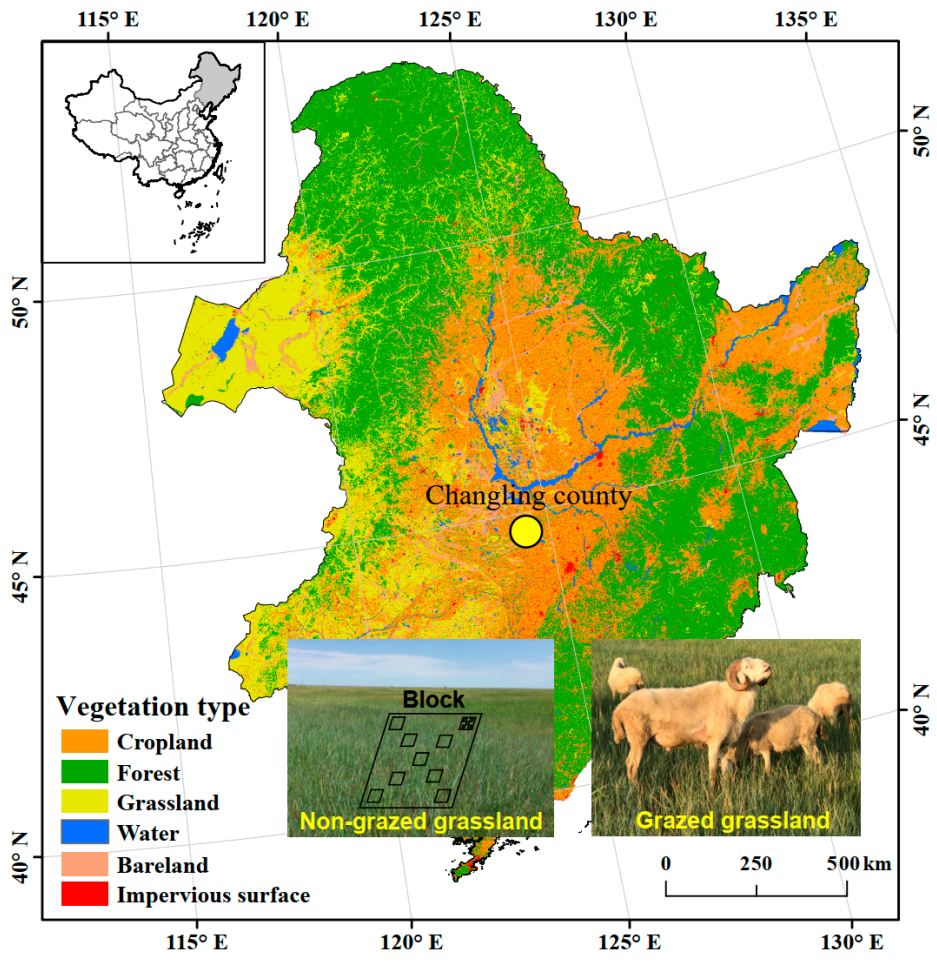

21  
 22  
 23  
 24

**Figure S1.** Location map of region showing non-grazed and grazed grasslands in Changling County, Jilin, China.

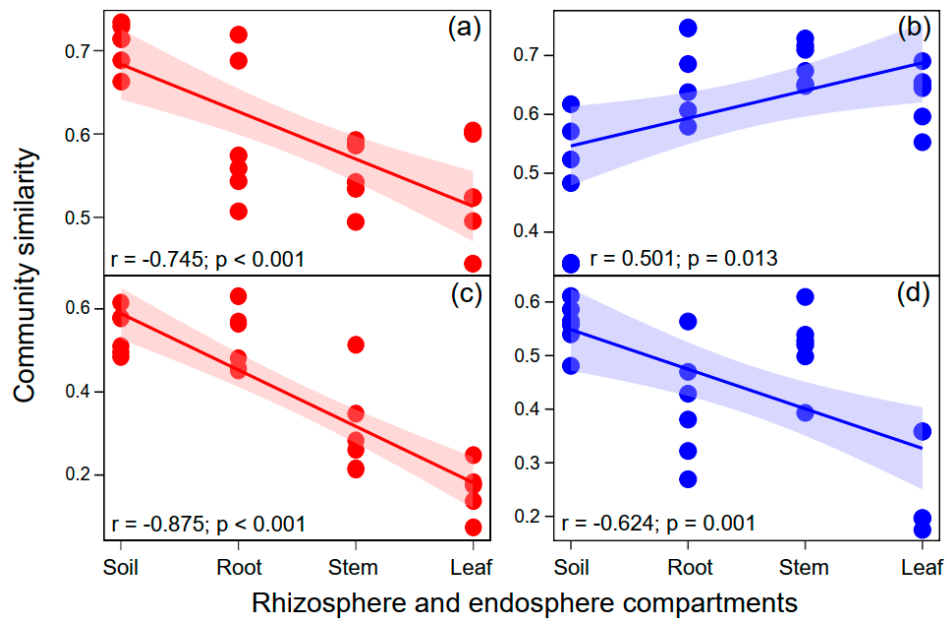

25

26 **Figure S2.** Community similarity among different rhizosphere and endosphere  
 27 compartments for bacterial communities (a-b) and fungal communities (c-d) in non-grazed  
 28 grassland (red circle) and grazed grassland (blue circle).

29

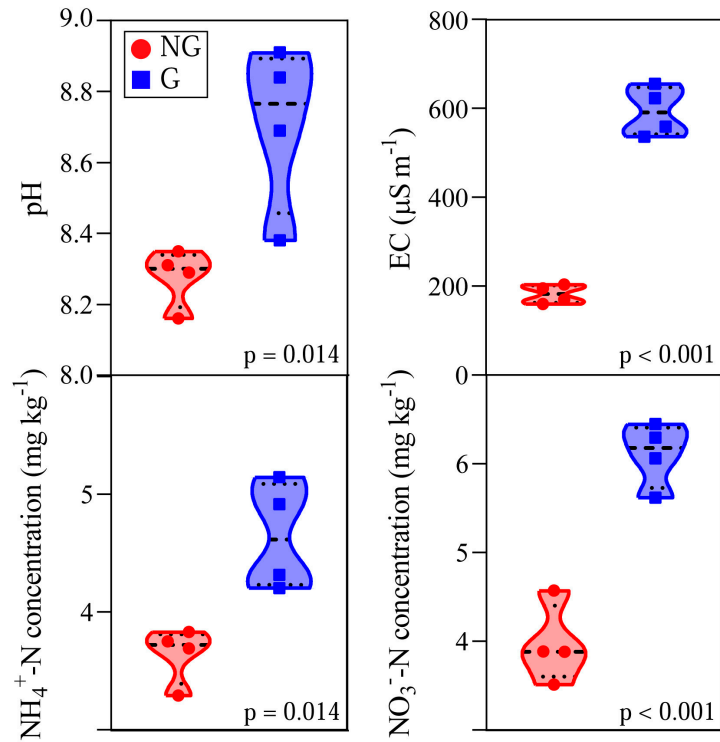

30

31 **Figure S3.** Effects of grazing on soil pH, EC, NH<sub>4</sub><sup>+</sup>-N and NO<sub>3</sub><sup>-</sup>-N concentrations. The  
 32 difference in soil property between non-grazed and grazed grasslands was calculated  
 33 using independent t-test. NG: non-grazed grassland; G: grazed grassland.

34

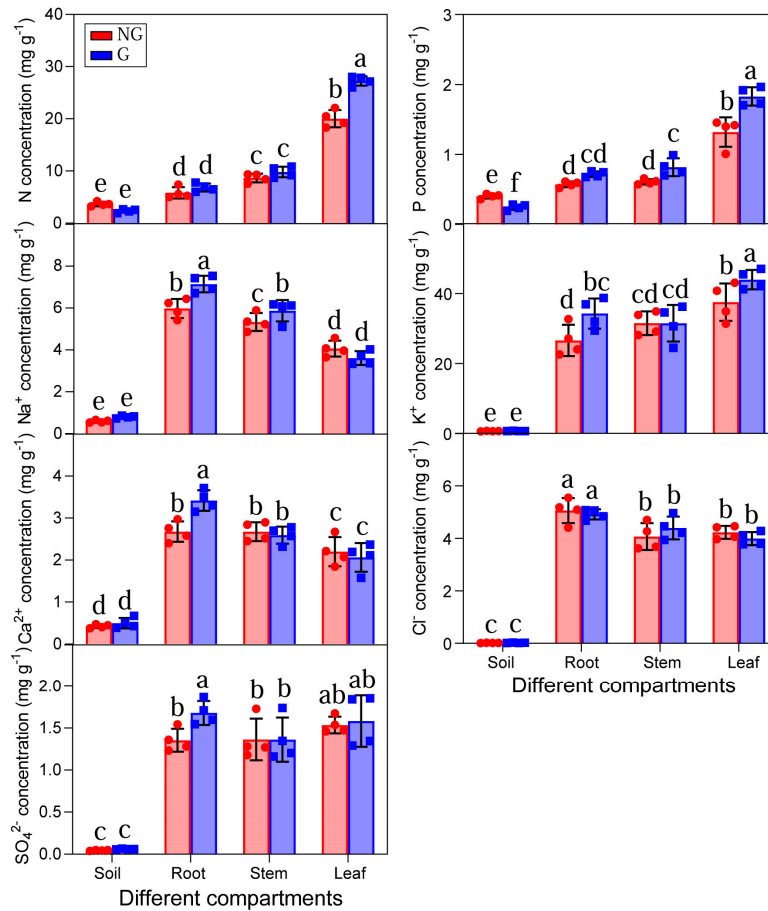

35

36 **Figure S4.** The nutrient (N and P) and ion (Na<sup>+</sup>, K<sup>+</sup>, Ca<sup>2+</sup>, Cl<sup>-</sup> and SO<sub>4</sub><sup>2-</sup>) concentrations of

37 rhizosphere soils, roots, stems and leaves of *Leymus chinensis* grown in non-grazed and

38 grazed grasslands. NG: non-grazed grassland; G: grazed grassland.

39

40 **Table S1.** Mantel tests for the correlation between microbial communities (based on Bray-  
 41 Curtis distance calculated from OTU table) and the environmental factors (based on  
 42 Euclidean distance) using Spearman's correlation.

| Environmental factors                                                  | Bacterial community |              | Fungal community |              |
|------------------------------------------------------------------------|---------------------|--------------|------------------|--------------|
|                                                                        | Mantel r            | p            | Mantel r         | p            |
| Nutrient (N and P)                                                     | 0.104               | 0.335        | 0.476            | <b>0.001</b> |
| Positive ions (Na <sup>+</sup> , K <sup>+</sup> and Ca <sup>2+</sup> ) | 0.222               | <b>0.009</b> | -0.041           | 0.646        |
| Negative ions (Cl <sup>-</sup> and SO <sub>4</sub> <sup>2-</sup> )     | 0.178               | <b>0.046</b> | -0.242           | <b>0.012</b> |

43
